# Supplementary material for: Improved performance of a polymer nanogenerator based on silver nanoparticles doped electrospun P(VDF–HFP) nanofibers
Source: Royal Society of Chemistry journal article supplement (doi:10.1039/c3cp55238a), 2014-01-01
Supplement: c3cp55238a1.pdf [file c3cp55238a1.pdf]

Electronic Supplementary Information (ESI)

**Improved performance of a polymer nanogenerator based on silver nanoparticles doped electrospun P(VDF-HFP) nanofibers†**

Dipankar Mandal<sup>a\*</sup>, Karsten Henkel<sup>b</sup>, Dieter Schmeißer<sup>b</sup>

<sup>a</sup>Organic Nano-Piezoelectric Device Laboratory, Department of Physics, Jadavpur University, Kolkata 700032, India

<sup>b</sup>Brandenburgische Technische Universität Cottbus - Senftenberg, Angewandte Physik-Sensorik, K.-Wachsmann-Allee 17, 03046 Cottbus, Germany

**Experimental:** In this work we have used three (0.5, 1.0, 1.5) different w/v % of AgNO<sub>3</sub> with respect to the polymer solution in order to achieve the optimum device performance.

Reference solvent casting free-standing films were prepared to understand the difference in crystalline phase modifications introduced by the electrospinning procedure.

**Chemical reaction involved in Ag-NPs formation:**

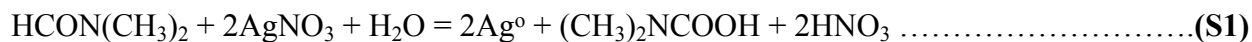

Eq.S1 describes the formation of Ag-NPs, where the solvent DMF [HCON(CH<sub>3</sub>)<sub>2</sub>] is acting as a reducing agent, which is also a good solvent of P(VDF-HFP). This is one of the tricks of the present study where unwanted external additives and multiple steps in Ag-NPs synthesis can be avoided.

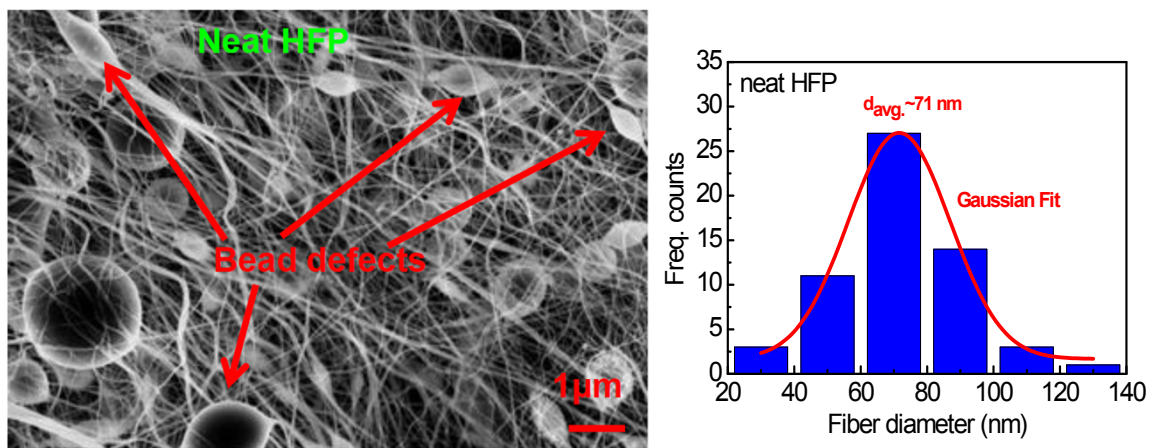

**Fig. S1** Fiber morphology (FE-SEM image: left pannel) of electrospun neat P(VDF-HFP) nanofibers consisting of large number of bead defects and the corresponding fiber diameters distribution (right pannel).

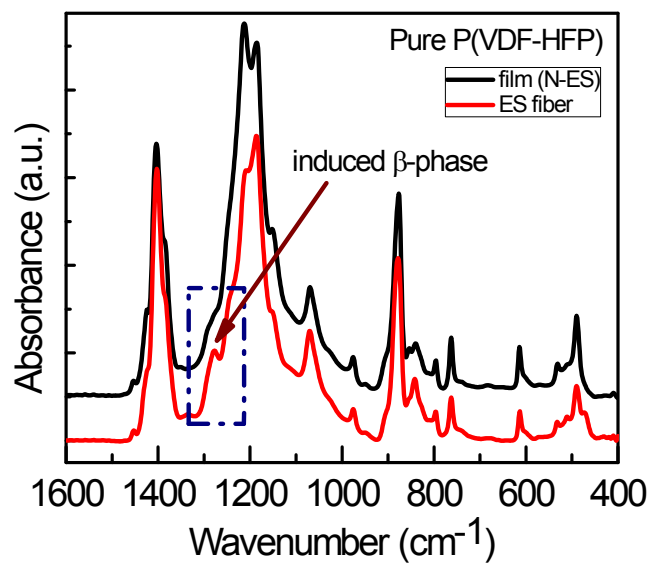

**Fig. S2** FT-IR spectra of electrospun (ES) fibers and thick film (N-ES) of neat P(VDF-HFP).

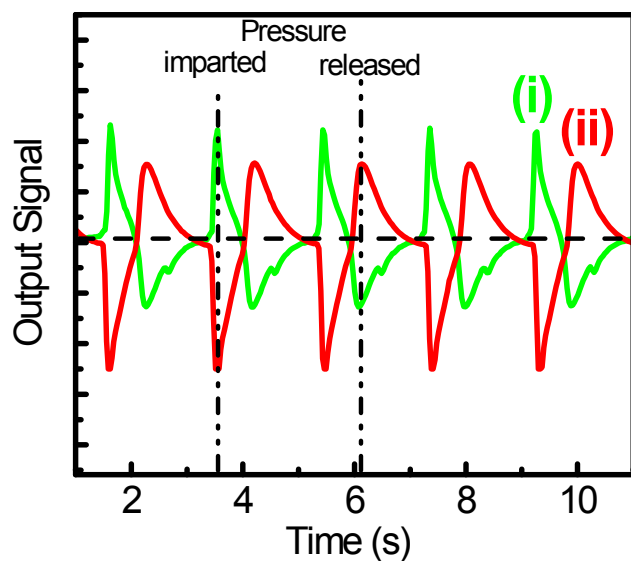

**Fig. S3** The output signal from the PNG, when pressure is imparted on the surface of (i) fibers-air interface and (ii) fibers-collector interface.

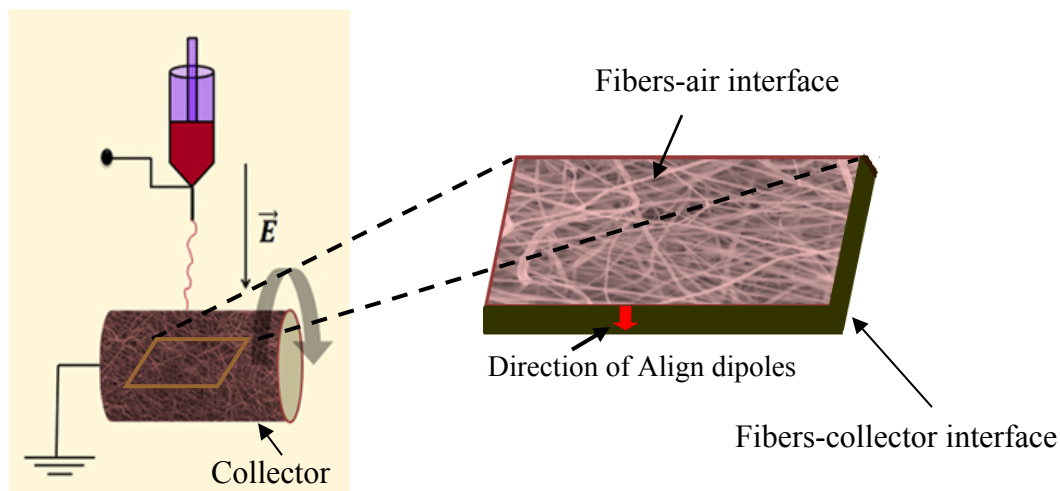

**Fig. S4** The preferential alignment of the dipoles is shown in the electrospun nanofibers collected on the Ni-coated flexible substrate (right panel diagram). The direction of the dipoles is parallel to the applied electric field ( $\vec{E}$ ) utilized in electrospinning set-up, shown in the left panel image.

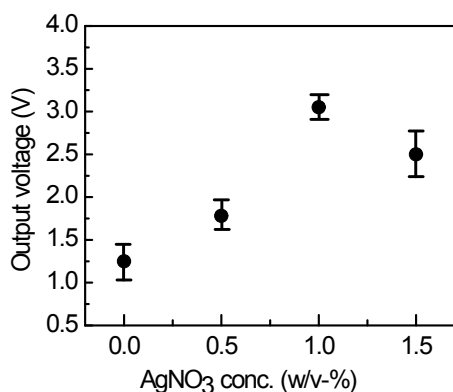

**Fig. S5** The generated output voltage of the PNGs fabricated with Ag-NPs doped electrospun P(VDF-HFP) fibers, where different w/v % of AgNO<sub>3</sub> was used. The corresponding FT-IR spectra of the electrospun samples are illustrated in Fig. S6. The output voltage decreases when AgNO<sub>3</sub> is 1.5 w/v % due to the reduction of the  $\beta$ -phase content and the appearance of the semi-polar  $\gamma$ -phase with little co-existence of the non-polar  $\alpha$ -phase (Fig. S6, sample: HFP-Ag1.5).

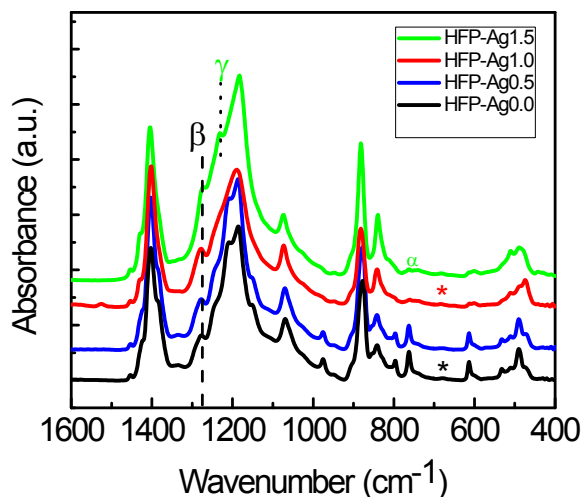

**Fig. S6** FT-IR spectra of the electrospun neat P(VDF-HFP) fibers [sample: HFP-Ag0.0] and Ag-NPs doped P(VDF-HFP) nanofibers [sample: HFP-Ag#, where # indicates the w/v % of AgNO<sub>3</sub> and the solvent used]. The ‘\*’ mark the samples presented in the main article and labeled as ‘neat-HFP’ and ‘HFP-Ag’.
